# Supplementary material for: Social and Structural Determinants of Household Support for ART Adherence in Low- and Middle-Income Countries: A Systematic Review
Source: MDPI journal article supplement (doi:10.3390/ijerph17113808), 2020-05-27
Supplement: s1 [file s1]

# Supplementary 1: Search Terms for Seven Databases Searched.

| Database                                                                            | Search Terms                                                                                                                                                                                                                                                                                                                                                                                                                                                                                                                                                                                                                                                                                                                                                                                                                                                                                |
|-------------------------------------------------------------------------------------|---------------------------------------------------------------------------------------------------------------------------------------------------------------------------------------------------------------------------------------------------------------------------------------------------------------------------------------------------------------------------------------------------------------------------------------------------------------------------------------------------------------------------------------------------------------------------------------------------------------------------------------------------------------------------------------------------------------------------------------------------------------------------------------------------------------------------------------------------------------------------------------------|
| Web of Sciences<br>Filter: 2003-2019<br>(TS = topic = title + abstract + key words) | #1 TS = (household* OR home* OR famil* OR couple* OR relationship* OR interpersonal)<br>#2 TS = (adhere* OR complian*)<br>#3 TS = (help OR support OR empower* OR care OR caring OR social support)<br>#4 TS = (HIV OR ART OR ARV OR viral* OR CD4 OR pill count OR antiretroviral therapy OR antiretroviral treatment)<br>#1 AND #2 AND #3 AND #4                                                                                                                                                                                                                                                                                                                                                                                                                                                                                                                                          |
| Cochrane/Evidence Based Reviews (OVID)                                              | #1 (household* OR home* OR family OR families OR couple* OR relationship*).ti,ab,kf.<br>#2 exp family/ or exp interpersonal relations/<br>#3 (adhere* OR complian*).ti,ab,kf.<br>#4 exp patient compliance/ or medication adherence/<br>#5 (help OR support OR empower* OR care OR caring OR social support). ti,ab,kf.<br>#6 (HIV OR ART OR ARV OR viral* OR CD4 OR pill count OR antiretroviral therapy OR antiretroviral treatment).ti,ab,kf.<br>#7 exp hiv/<br>#8 exp anti-retroviral agents/ or exp anti-hiv agents/<br>#9 exp Anti-Retroviral Agents/ or Antiretroviral Therapy, Highly Active/<br>#10 1 or 2<br>#11 3 or 4<br>#12 6 or 7 or 8 or 9<br>#13 10 and 11 and 12 and 5<br>#14 13 and 2003:2019. (sa_year).                                                                                                                                                                 |
| Medline<br>ti,ab,kf. = title + abstract + key words                                 | #1 (household* OR home* OR family OR families OR couple* OR relationship*).ti,ab,kf.<br>#2 exp family/ or exp interpersonal relations/<br>#3 (adhere* OR complian*).ti,ab,kf.<br>#4 exp patient compliance/ or medication adherence/ or exp "treatment adherence and compliance"/<br>#5 (help OR support OR empower* OR care OR caring OR social support). ti,ab,kf.<br>#6 (HIV OR ART OR ARV OR viral* OR CD4 OR pill count OR antiretroviral therapy OR antiretroviral treatment).ti,ab,kf.<br>#7 exp hiv/<br>#8 exp anti-retroviral agents/ or exp anti-hiv agents/<br>#9 exp Anti-Retroviral Agents/ or Antiretroviral Therapy, Highly Active/<br>#10 1 or 2<br>#11 3 or 4<br>#12 6 or 7 or 8 or 9<br>#13 10 and 11 and 12 and 5<br>#14 13 and 2003:2019. (sa_year).                                                                                                                    |
| PubMed<br>Filters: Publication date from 2003/01/01 to 2019/12/31                   | #1 [Title/Abstract] household* OR home* OR famil* OR couple* OR relationship*<br>#2 [MeSH Terms] family and household<br>#3 [MeSH Terms] interpersonal relations<br>#4 [Title/Abstract] adhere* OR complian*<br>#5 [MeSH Terms] patient compliance<br>#6 [MeSH Terms] medication adherence<br>#7 [MeSH Terms] "treatment adherence and compliance"<br>#8 [Title/Abstract] help OR support OR empower* OR care OR caring OR social support<br>#9 [Title/Abstract] HIV OR ART OR ARV OR viral* OR CD4 OR pill count OR antiretroviral therapy OR antiretroviral treatment<br>#10 [MeSH Terms] anti-retroviral agents OR<br>#11 [MeSH Terms] anti-hiv agents OR<br>#12 [MeSH Terms] Anti-Retroviral Agents<br>#13 [MeSH Terms] Antiretroviral Therapy, Highly Active<br>#14 #1 OR #2 OR #3<br>#15 #4 OR #5 OR #6 OR #7<br>#16 #9 OR #10 OR #11 OR #12 OR #13<br>#17 #14 AND #15 AND #8 AND #16 |
| EMBASE<br>Filter: 2003–2019                                                         | household* OR home* OR famil* OR couple* OR relationship* OR interpersonal<br>AND                                                                                                                                                                                                                                                                                                                                                                                                                                                                                                                                                                                                                                                                                                                                                                                                           |

|                                                                                                                                       |                                                                                                                                                                                                                                                                                                                                                                                                                                                                                                                                                                                                                                                                                                                         |
|---------------------------------------------------------------------------------------------------------------------------------------|-------------------------------------------------------------------------------------------------------------------------------------------------------------------------------------------------------------------------------------------------------------------------------------------------------------------------------------------------------------------------------------------------------------------------------------------------------------------------------------------------------------------------------------------------------------------------------------------------------------------------------------------------------------------------------------------------------------------------|
|                                                                                                                                       | <p>adhere* OR complian*</p> <p>AND</p> <p>help OR support OR empower* OR care OR caring OR social support</p> <p>AND</p> <p>HIV OR ART OR ARV OR viral* OR CD4 OR pill count OR antiretroviral therapy OR antiretroviral treatment</p>                                                                                                                                                                                                                                                                                                                                                                                                                                                                                  |
| <p>CINAHL<br/>(EBSCO)</p> <p>Filters ticked:<br/>peer-reviewed<br/>Jan. 2003–Dec. 2019<br/>'suggest subject terms' not<br/>ticked</p> | <p>(household* OR home* OR famil* OR couple* OR relationship*) OR MH "Interpersonal Relations+" OR MM "Interpersonal Relationships (Omaha)" OR (MH "Family")</p> <p>AND( adhere* OR complian*) OR MM "Medication Compliance" OR MH "Patient Compliance+" OR MM "Compliance with Medication Regimen (Saba CCC)"</p> <p>AND</p> <p>(help OR support OR empower* OR care OR caring OR social support) OR (MH "Support, Psychosocial+")</p> <p>AND</p> <p>(HIV OR ART OR ARV OR viral* OR CD4 OR pill count OR antiretroviral therapy OR antiretroviral treatment) OR (MM "Antiretroviral Therapy, Highly Active") OR (MH "Anti-Retroviral Agents+") OR (MM "HIV-AIDS Nursing") OR (MH "Human Immunodeficiency Virus+")</p> |
| <p>Psych-ARTICLES<br/>(ProQuest)</p> <p>Filter: Date: From 01 January<br/>2003 to 31 December 2019</p>                                | <p>#1 TIABSU(household* OR home* OR famil* OR couple* OR relationship* OR interpersonal)</p> <p>#2 TIABSU(adhere* OR complian*)</p> <p>#3 TIABSU(help OR support OR empower* OR care OR caring OR social support)</p> <p>#4 TIABSU(HIV OR ART OR ARV OR viral* OR CD4 OR pill count OR antiretroviral therapy OR antiretroviral treatment)</p> <p>#1 AND #2 AND #3 AND #4</p>                                                                                                                                                                                                                                                                                                                                           |
